# Supplementary material for: Determinants of adherence to antiretroviral therapy among HIV-positive adults in sub-Saharan Africa: a systematic review
Source: PubMed Central journal article supplement — BMJ Glob Health. 2016 Dec 30;1(4):e000125. doi: 10.1136/bmjgh-2016-000125 (PMC5321378; doi:10.1136/bmjgh-2016-000125), 2016-12-30
Supplement: bmjgh-2016-000125supp2.pdf [file bmjgh-2016-000125supp2.pdf]

Supplementary data 2; Overview of characteristics of studies included in the systematic review on determinants of adherence to ART in SSA

| Study                               | Country               | Study design                 | N        | Treatment status | Technique used for measurements | Adherence Outcome | Determinants outcome                                                                                                                                                                                                                                                          |
|-------------------------------------|-----------------------|------------------------------|----------|------------------|---------------------------------|-------------------|-------------------------------------------------------------------------------------------------------------------------------------------------------------------------------------------------------------------------------------------------------------------------------|
| <b>Adherence</b>                    |                       |                              |          |                  |                                 |                   |                                                                                                                                                                                                                                                                               |
| <b>Abaasa, AM; et al; 2008</b>      | Uganda                | Cohort, retrospective        | 897      | starting ART     | Self-report and Pill count      | 78,20%            | CD4 cell count                                                                                                                                                                                                                                                                |
| <b>Abah, OA; et al; 2014</b>        | Nigeria               | Cohort, retrospective        | 588      | on ART           | Pharmacy refill                 | 57,50%            | No significant determinants were found                                                                                                                                                                                                                                        |
| <b>Aboubacrine, SA; et al; 2007</b> | Burkina Faso and Mali | Cross-sectional, prospective | 270      | on ART           | Self-report and Clinical data   | 58% [100%]        | Being a housewife, Family planning, Pill burden                                                                                                                                                                                                                               |
| <b>Adewuya, AO; et al; 2010</b>     | Nigeria               | Cross-sectional, prospective | 182      | on ART           | Self-report                     | 73,10%            | Social support, Present general psychopathology                                                                                                                                                                                                                               |
| <b>Afolabi, MO; et al; 2009</b>     | Nigeria               | Cross-sectional, prospective | 120      | on ART           | Mixed methods                   | 44,00%            | Quantitative: Educational level, Employment, Financial constraints, Support groups, Knowledge about ART<br>Qualitative: Pill burden, Trust in health care workers, Forgetfulness, Food insecurity, Financial challenges, Social support, Stigma, Discrimination, Side effects |
| <b>Alakija, KS; et al; 2010</b>     | Nigeria               | Cross-sectional, prospective | 253      | on ART           | Self-report                     | 70,80%            | Male gender, Employment, Traveling distance and Transport fare.                                                                                                                                                                                                               |
| <b>Alemu, H; et al; 2011</b>        | Ethiopia              | Cross-sectional, prospective | 172<br>2 | on ART           | Self-report                     | 62,00%            | Age, Male gender, Use of alcohol                                                                                                                                                                                                                                              |

|                                    |              |                              |                                   |                    |                                                        |                                           |                                                                                                                                                                                                                             |
|------------------------------------|--------------|------------------------------|-----------------------------------|--------------------|--------------------------------------------------------|-------------------------------------------|-----------------------------------------------------------------------------------------------------------------------------------------------------------------------------------------------------------------------------|
| <b>Amberbir, A; et al; 2008</b>    | Ethiopia     | Cohort, prospective          | 400 baseline, 383 follow up visit | on ART             | Self-report                                            | 96% [baseline] 94,3% [3 months follow-up] | Social support, Depression, Use of memory aids                                                                                                                                                                              |
| <b>Aspeling, HE; van Wyk; 2008</b> | South Africa | Qualitative, prospective     | 11                                | on ART             | Interviews, semi-structured                            | -                                         | Side effects, Financial challenges, Discrimination, Competition with family needs, Concerns about ART, Children, Trust in health care worker, Changing care provider/treatment                                              |
| <b>Audu, B; et al; 2014</b>        | Nigeria      | Qualitative, prospective     | 35                                | on ART             | Interviews, semi-structured                            | -                                         | Religion, Stigma, Dissatisfaction with care                                                                                                                                                                                 |
| <b>Banjunirwe, F; et al; 2009</b>  | Uganda       | Cohort, prospective          | 175                               | on ART [6> months] | Self-report                                            | 85,2% [100%]                              | Missing clinic visits, Disclosure, CD4 cell count                                                                                                                                                                           |
| <b>Bastard, M; et al; 2011</b>     | Senegal      | Cohort, prospective          | 330                               | starting ART       | Self-report and Pill count                             | 74,8% [start], 71% [5th year]             | Female gender, Co-trimoxazole prophylaxis                                                                                                                                                                                   |
| <b>Belenky, NM; et al; 2014</b>    | Tanzania     | Cohort, prospective          | 403                               | on ART             | Self-report                                            | 76,70%                                    | Depression                                                                                                                                                                                                                  |
| <b>Beyena, KA; et al; 2009</b>     | Ethiopia     | Cross-sectional, prospective | 422                               | on ART [3> months] | Mixed methods                                          | 93,1% [self-report] 88,1% [pill count]    | Quantitative: Marital status, Employment, Disclosure, Social support, Use of alcohol, Regimen type, Pill burden, Duration of ART<br>Qualitative: Counselling, Food insecurity, Financial challenges, Stigma, Discrimination |
| <b>Bezabhe, WM; et al; 2014</b>    | Ethiopia     | Qualitative, prospective     | 58                                | on ART [1> month]  | Focus group discussions and Interviews semi-structured | 69% [never missed appointments]           | Disclosure, Social support, Memory aids, Children, Counselling, Perceived health-status, Financial challenges, Stigma, Discrimination, Religion, Dissatisfaction with care, Side effects                                    |

|                                            |              |                              |      |                   |                                                         |              |                                                                                                                                                                                                                                                    |
|--------------------------------------------|--------------|------------------------------|------|-------------------|---------------------------------------------------------|--------------|----------------------------------------------------------------------------------------------------------------------------------------------------------------------------------------------------------------------------------------------------|
| <b>Bhagwanjee, A; et al; 2011</b>          | South Africa | Qualitative, prospective     | 19   | on ART            | Interviews, semi-structured                             | -            | Necessity/Utility ART, Adherence self-efficacy, Acceptance of HIV, Trust in health care provider, Children, Food insecurity, Substance abuse, Employment, Other ailments, Perceived health-status, Masculinity, Stigma, Discrimination, Disclosure |
| <b>Bhat, VG; et al; 2010</b>               | South Africa | Cross-sectional, prospective | 168  | on ART            | Self-report                                             | 62,50%       | Marital status, Education, Use of alcohol, Employment                                                                                                                                                                                              |
| <b>Bhengu, BR; et al; 2011</b>             | South Africa | Cross-sectional, prospective | 149  | on ART            | AIDS clinical trial group adherence scale               | 79,00%       | Perceived health status                                                                                                                                                                                                                            |
| <b>Birbeck, GL; et al; 2011</b>            | Zambia       | Cohort, retrospective        | 496  | starting ART      | Clinical records                                        | 59,50%       | Side effects, Female gender, Marital status, Education, Food insecurity                                                                                                                                                                            |
| <b>Birbeck, GL; et al; 2009</b>            | Zambia       | Cohort, prospective          | 255  | on ART            | Clinical records, Visual analogue scale and Self report | 59,20%       | Knowing status others, Disclosure, Clinic buddy                                                                                                                                                                                                    |
| <b>Boyer, S; et al; 2011</b>               | Cameroon     | Cross-sectional, prospective | 2381 | on ART            | Self-report                                             | 53,9% [100%] | Marital status, Use of alcohol, Food insecurity, Discrimination, Change in treatment, Dissatisfaction with care                                                                                                                                    |
| <b>Brinkley-Rubinstein, L; et al; 2013</b> | South Africa | Cohort, retrospective        | 171  | on ART            | Pill count                                              | 53% [>90%]   | Experienced serious life event                                                                                                                                                                                                                     |
| <b>Byakika-Tusiime, J; et al; 2005</b>     | Uganda       | Cross-sectional, prospective | 304  | on ART [1> month] | Self-report                                             | 68,00%       | Employment, Marital status                                                                                                                                                                                                                         |
| <b>Carlucci, JG; et al; 2008</b>           | Zambia       | Cohort, prospective          | 424  | on ART            | Pill count                                              | 83,70%       | Duration of ART                                                                                                                                                                                                                                    |
| <b>Charurat, M; et al; 2010</b>            | Nigeria      | Cohort, retrospective        | 5760 | on ART            | Pharmacy refill                                         | 25,80%       | Age, Education, Disclosure, Distance to clinic, CD4 cell count, Regimen type                                                                                                                                                                       |

|                                  |               |                              |           |                                                       |                                              |                                                 |                                                                                                                                                                                                                              |
|----------------------------------|---------------|------------------------------|-----------|-------------------------------------------------------|----------------------------------------------|-------------------------------------------------|------------------------------------------------------------------------------------------------------------------------------------------------------------------------------------------------------------------------------|
| <b>Chi, BH; et al; 2009</b>      | Zambia        | Cohort, retrospective        | 271<br>15 | on ART                                                | Medication possession rate and Clinical data | 62,90%                                          | Age, Clinic buddy, CD4 cell count, Haemoglobin                                                                                                                                                                               |
| <b>Dahab, M; et al; 2008</b>     | South Africa  | Qualitative, prospective     | 13        | on ART [2> months]                                    | Interviews                                   | -                                               | Perceived health status, Disclosure, Social support, Necessity/utility ART, use of Alcohol, Traveling, Stigma, Use of traditional medicines, Lack of belief in HIV, Age, Illiteracy, Side effects, Dissatisfaction with care |
| <b>Diabaté, S; et al; 2007</b>   | Côte d'Ivoire | Case-control, prospective    | 614       | starting ART and on ART [12> months]                  | Self-report                                  | 74,30%                                          | Age, Social support, Pill burden, Duration of ART, CD4 cell count, Attitude towards HIV                                                                                                                                      |
| <b>Do, NT; et al; 2010</b>       | Botswana      | Cross-sectional, prospective | 300       | on ART [1> month, 6>months, 12>months]                | Self-report and Pharmacy refill              | 83,10%                                          | Depression, Use of alcohol, Disclosure, Stigma                                                                                                                                                                               |
| <b>Eholié, S; et al; 2007</b>    | Côte d'Ivoire | Cross-sectional, prospective | 308       | on ART [1> month]                                     | Self-report                                  | 24% [>90%]                                      | Education, Commitment to treatment                                                                                                                                                                                           |
| <b>Ekwunife, OI; et al; 2012</b> | Nigeria       | Cross-sectional, prospective | 212       | on ART [6> months]                                    | Self-report                                  | 89,4% [CAM non-users] and 82,5% for [CAM users] | Complementary and alternative medicine                                                                                                                                                                                       |
| <b>Elul, B; et al; 2013</b>      | Rwanda        | Cross-sectional, prospective | 141<br>7  | on ART [6, 12 and 18 months prior to data collection] | Self-report                                  | 78% [100%] + 11% [90-99%]                       | Age, Side effects, CD4 cell count, Use of alcohol                                                                                                                                                                            |
| <b>Erah, OP; Arute JE; 2008</b>  | Nigeria       | Cross-sectional, prospective | 125       | on ART [6 months]                                     | Self-report and Pharmacy refill/pill count   | 58,10%                                          | Side effects, Education                                                                                                                                                                                                      |
| <b>Etard, JF; et al; 2007</b>    | Senegal       | Cohort, prospective          | 158       | on ART [1> month]                                     | Pharmacy refill                              | 72% [6 months above 90%], 70% [4 year 95%]      | CDC stage, Duration of ART                                                                                                                                                                                                   |

|                                  |                                           |                                |     |                     |                                                  |                                                               |                                                                                                                                                                                      |
|----------------------------------|-------------------------------------------|--------------------------------|-----|---------------------|--------------------------------------------------|---------------------------------------------------------------|--------------------------------------------------------------------------------------------------------------------------------------------------------------------------------------|
| <b>Etienne, M; et al;2010</b>    | Kenya, Uganda, Zambia, Nigeria and Rwanda | Cross-sectional, retrospective | 921 | on ART [12> months] | Questionnaire at viral load sampling             | 72,00%                                                        | Living situation, Employment, Use of alcohol, Depression, Quality of care                                                                                                            |
| <b>Falang, KD; et al; 2012</b>   | Nigeria                                   | Cross-sectional, prospective   | 461 | on ART [1> month]   | Self-report                                      | 87,90%                                                        | Age, Use of alcohol, Pill burden                                                                                                                                                     |
| <b>Ford, N; et al; 2010</b>      | South Africa                              | Cohort, prospective            | 207 | on ART              | Self-report                                      | 87,00%                                                        | No significant determinants were found                                                                                                                                               |
| <b>Garang, PG; et al; 2009</b>   | Uganda                                    | Cross-sectional, prospective   | 200 | on ART              | Self-report                                      | 99,50%                                                        | Regimen type, Dissatisfaction with care                                                                                                                                              |
| <b>Goldman, JD; et al; 2008</b>  | Zambia                                    | Cohort, retrospective          | 913 | on ART              | Medication possession ration and Self report     | 58,00%                                                        | BMI                                                                                                                                                                                  |
| <b>Goudge, J; Ngoma, B; 2011</b> | South Africa                              | Qualitative, prospective       | 22  | on ART              | Interviews, in-depth                             | -                                                             | Social support, Disclosure, Food insecurity, Financial challenges, Stigma, Side effects, Pill burden, children/caring too much time                                                  |
| <b>Graham, SM; et al; 2013</b>   | Kenya                                     | Cohort, prospective            | 68  | starting ART        | Visual analogue scale and Pharmacy data          | 60 % [MSM], 72,4% [heterosexual men] & 88,5% [women]; p=0,047 | Men who have sex with men                                                                                                                                                            |
| <b>Grant, E; et al; 2008</b>     | Zambia                                    | Qualitative, prospective       | 40  | -                   | Focus group discussions and Interviews, in-depth | -                                                             | Food insecurity, Perceived health status, Adherence self-efficacy, Social support, Memory aids, Employment, Wanting to return to live before HV                                      |
| <b>Groh, K; et al; 2011</b>      | Mozambique                                | Qualitative, prospective       | 164 | -                   | Focus group discussions                          | -                                                             | Financial challenges, Transportation, Dissatisfaction with care, Education, Language barrier, Saving medicine, No understanding of chronic diseases, Traditional healers, Disclosure |

|                                 |                               |                              |                               |                    |                                                                         |                                                                 |                                                                                                                                                                                      |
|---------------------------------|-------------------------------|------------------------------|-------------------------------|--------------------|-------------------------------------------------------------------------|-----------------------------------------------------------------|--------------------------------------------------------------------------------------------------------------------------------------------------------------------------------------|
| <b>Gusdal, A; et al; 2009</b>   | Ethiopia and Uganda           | Qualitative, prospective     | 118                           | on ART [6> months] | Interviews, semi-structured                                             | -                                                               | Necessity/Utility ART, Perceived health-status, Counselling, Trust in health care workers, Financial challenges, Dissatisfaction with care, Side effects, Other ailments, Employment |
| <b>Habib, AG; et al; 2009</b>   | Nigeria                       | Cross-sectional, prospective | 142                           | on ART             | Self-report                                                             | 95,8% FT and 98% NFT                                            | No significant determinants were found                                                                                                                                               |
| <b>Hardon, A; et al; 2007</b>   | Botswana, Tanzania and Uganda | Qualitative, prospective     | 343 and 34 FGD unknown number | on ART             | Focus group discussions, Interview semi-structured and Exit interviews  | -                                                               | Social support, Counselling, Financial challenges (transport costs), Dissatisfaction with care, Food insecurity, Stigma, Side effects, Employment                                    |
| <b>Hegazi, A; et al; 2010</b>   | Gambia                        | Cross-sectional, prospective | 147                           | on ART             | Patient records, Self-report and Viral load                             | 49% [100%]                                                      | Education                                                                                                                                                                            |
| <b>Idindili, B; et al; 2012</b> | Tanzania                      | Case-control, prospective    | 316                           | on ART [3> months] | Self-report, Pharmacy refill, Visual analogy scale (VAS) and Pill count | NA                                                              | Disclosure, Use of alcohol, Missed clinic appointments (bus fare), Knowledge of HIV/ART, Dissatisfaction with health care providers                                                  |
| <b>Jaquet, A; et al; 2010</b>   | Benin, Côte d'Ivoire and Mali | Cross-sectional, prospective | 2920                          | on ART [1> month]  | AIDS clinical trials group follow-up questionnaire                      | 91,80%                                                          | Use of alcohol, Adherence counselling                                                                                                                                                |
| <b>Jones, D; et al; 2014</b>    | Zambia                        | Cohort, prospective          | 446                           | on ART             | AIDS clinical trials group follow-up questionnaire                      | 76% [100% baseline], 66% [100% 6 months], 70% [100% 12 months ] | Duration of ART, Adherence of partner                                                                                                                                                |

|                                             |              |                              |     |                    |                                        |                                                 |                                                                                                                                                                                                                               |
|---------------------------------------------|--------------|------------------------------|-----|--------------------|----------------------------------------|-------------------------------------------------|-------------------------------------------------------------------------------------------------------------------------------------------------------------------------------------------------------------------------------|
| <b>Kagee, A; et al; 2012</b>                | South Africa | Qualitative, prospective     | 10  | on ART             | Interviews, semi-structured            | -                                               | Disclosure, Employment, Financial challenges (travelling), Food insecurity, Dissatisfaction with care, Use of alcohol, Stigma                                                                                                 |
| <b>Kebede, A; Wabe, NT; 2012</b>            | Ethiopia     | Cross-sectional, prospective | 296 | on ART             | Self-report                            | 95,80%                                          | No significant determinants were found                                                                                                                                                                                        |
| <b>Kekwaletsw e, CT; Morojele, NK; 2014</b> | South Africa | Cross-sectional, prospective | 304 | on ART [4> months] | Self-report                            | 67,80%                                          | Use of alcohol                                                                                                                                                                                                                |
| <b>Kip, E; et al; 2009</b>                  | Botswana     | Cross-sectional, prospective | 400 | on ART             | Self-report                            | 95,30%                                          | Knowledge about ART, HIV, AIDS CD4 cell count and Viral-load results, Stigma, Financial challenges, Dissatisfaction with care/health workers, Side effects, Use of traditional (indigenous or folk) medicines, Use of alcohol |
| <b>Kisenyi, RN; et al; 2013</b>             | Uganda       | Cross-sectional, prospective | 220 | on ART [6> months] | Visual analogue scale                  | 66% [90%]                                       | Religion                                                                                                                                                                                                                      |
| <b>Kunutsor, S; et al; 2010</b>             | Uganda       | Cohort, prospective          | 967 | on ART             | Self-report and pill count             | 97,3% [pill count]& 98,4% [self-report methods] | Age                                                                                                                                                                                                                           |
| <b>Laniènce, I; et al; 2003</b>             | Senegal      | Cohort, prospective          | 158 | on ART             | Self-report and Pill count             | 91,00%                                          | Study type, Free ART                                                                                                                                                                                                          |
| <b>Lubinga, S; et al; 2012</b>              | Uganda       | Cross-sectional, prospective | 334 | on ART             | Self-report and CASE                   | 80,50%                                          | Complementary and alternative medicine, Perceived health status                                                                                                                                                               |
| <b>Lyimo, RA; et al; 2012</b>               | Tanzania     | Qualitative, prospective     | 61  | on ART [6> months] | Interviews, semi-structured            | -                                               | Children, Disclosure, Protectors, Religion, Use of alcohol, Food insecurity, Stigma, Side effects, Dissatisfaction with care, Medication delivery                                                                             |
| <b>Lyimo, RA; et al; 2014</b>               | Tanzania     | Cross-sectional, prospective | 158 | on ART [6>months]  | Self-report, Pill count and Viral load | 99,50%                                          | Marital status, Use of alcohol, Stigma                                                                                                                                                                                        |

|                                    |              |                                |     |                   |                                                                     |                                                 |                                                                                                                                                                                                                                                                                                                                                                                                             |
|------------------------------------|--------------|--------------------------------|-----|-------------------|---------------------------------------------------------------------|-------------------------------------------------|-------------------------------------------------------------------------------------------------------------------------------------------------------------------------------------------------------------------------------------------------------------------------------------------------------------------------------------------------------------------------------------------------------------|
| <b>Malangu, NG; 2008</b>           | South Africa | Cross-sectional, prospective   | 180 | on ART            | Self-report                                                         | 57,20%                                          | Food insecurity, Use of alternative medicine, Side effects, BMI, Viral load                                                                                                                                                                                                                                                                                                                                 |
| <b>Maqutu, D; et al; 2010</b>      | South Africa | Cohort, prospective            | 688 | on ART [<1 month] | Pill count                                                          | 79,00%                                          | Age, CD4 cell count, Memory aids, Reason for HIV test                                                                                                                                                                                                                                                                                                                                                       |
| <b>Maqutu, D; Zewotir, T; 2011</b> | South Africa | Cohort, prospective            | 688 | on ART            | Pill count                                                          | 58% [1 month] to 86% [17th visit]               | Male gender, Education, Geographical area                                                                                                                                                                                                                                                                                                                                                                   |
| <b>Marcellin, F; et al; 2008</b>   | Cameroon     | Cross-sectional, prospective   | 533 | on ART            | Self-report                                                         | 87,2% [treatment interruption less than 2 days] | Male gender, Education, Employment, Regimen type, Use of alcohol, Side effects, Pharmacy stock out                                                                                                                                                                                                                                                                                                          |
| <b>Markos, E; et al; 2008</b>      | Ethiopia     | Cross-sectional, retrospective | 291 | on ART            | Self-report and Pill count                                          | 74,20%                                          | Side effects, Distance to clinic, Children                                                                                                                                                                                                                                                                                                                                                                  |
| <b>Martin, F; et al; 2013</b>      | Uganda       | Qualitative, prospective       | 20  | on ART [1> year]  | Interviews, in-depth                                                | -                                               | Drug supply, Distance to clinic, Maintaining health, Counselling, Knowledge on ART, Food insecurity, Social support, Memory aids, Daily routine, Perceived health-status, CD4 cell count, Support groups, Financial challenges, Dissatisfaction with care, Pill burden, Forgetting/traveling, Change in care, Disclosure, Stressful events, Other ailments, Concerns about ART, Stigma through side effects |
| <b>Matovu, S; et al; 2012</b>      | Uganda       | Qualitative, prospective       | 6   | on ART            | Interviews, semi-structured                                         | -                                               | Side effects, Disclosure, Medication and daily routine, Social support, Discrimination                                                                                                                                                                                                                                                                                                                      |
| <b>Mayanja, BN; et al; 2013</b>    | Uganda       | Cohort, prospective            | 315 | starting ART      | Self-report, Pill count, CD4 cell count and Viral load measurements | 94,00%                                          | No significant determinants were found                                                                                                                                                                                                                                                                                                                                                                      |



|                                   |                                      |                              |      |                                             |                                        |        |                                                                                                                                                                                                                                                                                    |
|-----------------------------------|--------------------------------------|------------------------------|------|---------------------------------------------|----------------------------------------|--------|------------------------------------------------------------------------------------------------------------------------------------------------------------------------------------------------------------------------------------------------------------------------------------|
| <b>Mbonye, M; et al; 2013</b>     | Uganda                               | Qualitative, prospective     | 24   | on ART                                      | Interviews, in-depth                   | -      | Status partner, Use of alcohol, Feeling after several years that their no direct consequences for non-adherence, Taking ART without food, not able to eat while working, Daily routine, Financial challenges (transport), Side effects, Duration of ART, Dissatisfaction with care |
| <b>Medley, A; et al; 2014</b>     | Kenya, Namibia and Tanzania          | Cohort, prospective          | 3538 | 64% on ART                                  | Self-report and Medical records        | 84,16% | Use of alcohol                                                                                                                                                                                                                                                                     |
| <b>Memiah, P; et al; 2013</b>     | Nigeria, Tanzania, Uganda and Zambia | Cross-sectional, prospective | 2344 | on ART [9> months]                          | Self-report and Scheduled instructions | 77,00% | Depression, Age, CD4 cell count, Knowledge about ART                                                                                                                                                                                                                               |
| <b>Mitiku, H; et al; 2013</b>     | Ethiopia                             | Cross-sectional, prospective | 239  | on ART [month 1]                            | Self-report                            | 87,00% | No significant determinants were found                                                                                                                                                                                                                                             |
| <b>Morojele, NK; et al; 2014</b>  | South Africa                         | Cross-sectional, prospective | 304  | on ART [4> months]                          | CASE adherence index                   | 54,70% | Male gender, Use of alcohol                                                                                                                                                                                                                                                        |
| <b>Mûnene, E; Ekman, B; 2014</b>  | Kenya                                | Cross-sectional, prospective | 392  | on ART [4> weeks]                           | Self-report                            | 84,30% | Employment, Education, Duration of ART, Change in care, Side effects                                                                                                                                                                                                               |
| <b>Murray, L; et al; 2009</b>     | Zambia                               | Qualitative, prospective     | 80   | eligible for ART, on ART, stopped treatment | Interview, free listing techniques     | -      | Side effects, Perceived health-status, Fear of divorce, Don't want to be adherent, Rumours about drugs, Food insecurity, Taking drugs for life, Fear of being laughed at, ready to die                                                                                             |
| <b>Musumari, P; et al; 2013</b>   | Democratic Republic of Congo         | Qualitative, prospective     | 38   | on ART, re-treatment and lost to follow up  | Interview, semi-structured             | -      | Religion and traditional beliefs, Food insecurity, Financial challenges, Forgetfulness, Disclosure, Stigma, Travel and migration, feeling hopeless, Side effects, Use of alcohol, Use of traditional medicines                                                                     |
| <b>Musumari, PM; et al.; 2014</b> | Democratic                           | Cross-sectional, prospective | 898  | on ART [6> months]                          | Self-report and Pharmacy refill        | 79,91% | Food insecurity, Psychological distress, Knowing status of others, Use of Alcohol, Duration of ART, Concerns about ART                                                                                                                                                             |

|                                  |                     |                                |                                                  |                    |                                                                                      |                                       |                                                                                                                                                 |
|----------------------------------|---------------------|--------------------------------|--------------------------------------------------|--------------------|--------------------------------------------------------------------------------------|---------------------------------------|-------------------------------------------------------------------------------------------------------------------------------------------------|
|                                  | Republic of Congo   |                                |                                                  |                    |                                                                                      |                                       |                                                                                                                                                 |
| <b>Muya, AN; et al; 2014</b>     | Tanzania            | Cohort, prospective            | 44204                                            | on ART             | Pharmacy refill                                                                      | 81,00%                                | Age, WHO stage, BMI, Regimen type                                                                                                               |
| <b>Muyingo, SK; et al; 2008</b>  | Uganda and Zimbabwe | Cross-sectional, retrospective | 2957                                             | starting ART       | Pill count and Self report questionnaire                                             | 87% [4 weeks] to 94% [52 weeks]       | Amount of sexual partners, Duration of ART                                                                                                      |
| <b>Nachenga, J; et al; 2006</b>  | South Africa        | Qualitative, prospective       | 19                                               | on ART [3> months] | Focus group discussions and Interviews in-depth                                      | -                                     | Disclosure, Support health care providers, Social support, Support in depression/alcohol treatments, Assistance with resolving family conflicts |
| <b>Nachenga, JB; et al; 2009</b> | Southern Africa     | Cohort, prospective            | 7622                                             | on ART             | Pharmacy refill, Viral load and CD4 cell count                                       | 20,7% [11-19, 100%] 40.5% [20>, 100%] | Age                                                                                                                                             |
| <b>Nachenga, JB; et al; 2012</b> | South Africa        | Cross-sectional, retrospective | 274                                              | starting ART       | Pill count, Viral suppression and IRIS (immune reconstitution inflammatory syndrome) | 95,5% [IRIS event], 98.2% [no IRIS]   | Use of alcohol, IRIS event                                                                                                                      |
| <b>Naidoo, P; et al; 2013</b>    | South Africa        | Cross-sectional, prospective   | 3107 [on anti-TB treatment for 3 weeks]. 757 [on | on ART             | Self-report                                                                          | 57,80%                                | Male gender, Employment, Other ailments, Use of alcohol, Use of tobacco, Status partner, Being sexual active, Perceived health status           |

|                                        |                                       |                                | ART ]     |                     |                                             |                                           |                                                                                                                                                                                                                                                                           |
|----------------------------------------|---------------------------------------|--------------------------------|-----------|---------------------|---------------------------------------------|-------------------------------------------|---------------------------------------------------------------------------------------------------------------------------------------------------------------------------------------------------------------------------------------------------------------------------|
| <b>Nakimuli-Mpungu, E; et al; 2009</b> | Uganda                                | Cross-sectional, retrospective | 122       | on ART              | Self-report                                 | 70% [start], 82,8% [month prior to study] | Psychological distress, Living in isolation                                                                                                                                                                                                                               |
| <b>Nakimuli-Mpungu, E; et al; 2013</b> | Uganda                                | Case control, retrospective    | 400       | on ART [6> months]  | Pill count                                  | NA                                        | Depression, Use of alcohol, Cognitive impairment, Tuberculosis, Social support, Self-efficacy                                                                                                                                                                             |
| <b>Nam, S; et al; 2008</b>             | Botswana                              | Qualitative, prospective       | 32        | on ART [6> months]  | Interviews, in-depth and reflexive approach | -                                         | Acceptance of HIV, Clinic buddy, Active in social groups, Support groups, Faith that god produced bio-medicine, Perceived health status, Denial of status/self-stigmatization, Hopeless, Use of alcohol, Use of traditional and/or alternative medicines, Food insecurity |
| <b>Ncama, BP; et al; 2008</b>          | South Africa                          | Cross-sectional, prospective   | 149       | on ART              | Self-report                                 | 79,00%                                    | No significant determinants were found                                                                                                                                                                                                                                    |
| <b>Ndiaye, M; et al; 2013</b>          | Botswana                              | Cross-sectional, prospective   | 82        | on ART [6> months]  | Pill count and Self report                  | 75,60%                                    | Male gender, Pharmacy refill                                                                                                                                                                                                                                              |
| <b>Negash, T; Ehlers, VD; 2013</b>     | Ethiopia                              | Cross-sectional, prospective   | 355       | on ART [<12 months] | Pill count                                  | 73,50%                                    | Male gender, Stigma, Discrimination, Depression, Use of alcohol                                                                                                                                                                                                           |
| <b>Nel, A; Kagee, A; 2013</b>          | South Africa                          | Cross-sectional, prospective   | 101       | on ART [6> months]  | Self-report                                 | 54,5% [100%]                              | Depression                                                                                                                                                                                                                                                                |
| <b>Newman, J; et al; 2012</b>          | Burundi, Cameroon, and the Democratic | Cohort, prospective            | 188<br>39 | on ART              | Self-report                                 | NA                                        | Age                                                                                                                                                                                                                                                                       |

|                                       |                     |                              |     |                    |                                              |              |                                                                                                                                                                                                                                                                                                                                   |
|---------------------------------------|---------------------|------------------------------|-----|--------------------|----------------------------------------------|--------------|-----------------------------------------------------------------------------------------------------------------------------------------------------------------------------------------------------------------------------------------------------------------------------------------------------------------------------------|
|                                       | Republic of Congo   |                              |     |                    |                                              |              |                                                                                                                                                                                                                                                                                                                                   |
| <b>Ngarina, M; et al; 2013</b>        | Tanzania            | Qualitative, prospective     | 23  | on ART             | Interviews, semi-structured                  | -            | Lack of motivation after delivery, Perceived health-status, Hopeless/depression, Financial challenges, Daily routine/forgetting, Traveling, Stigma, Food insecurity                                                                                                                                                               |
| <b>Nozaki, I; et al; 2011</b>         | Zambia              | Cross-sectional, prospective | 518 | on ART             | Self-report                                  | 88,00%       | Age, Memory aids, Sharing medication                                                                                                                                                                                                                                                                                              |
| <b>Nwauche, CA; et al; 2006</b>       | Nigeria             | Cross-sectional, prospective | 187 | on ART [6> months] | Self-report                                  | 49,20%       | Employment, Care system                                                                                                                                                                                                                                                                                                           |
| <b>Nyanzi-Wakholi, B; et al; 2009</b> | Uganda and Zimbabwe | Qualitative, prospective     | -   | Half sample on ART | Focus group discussions                      | -            | Pre and post-test counselling, Perceived health-status, ART clear dosage compared to herbal, Use of herbal/traditional medicine, Misconception ART, Food insecurity, Pill burden, Forgetting pills, Disclosure, Side effects, Being accused of infecting others by restarting sexual relations after physical improvement by ART. |
| <b>Nyanzi-Wakholi, B; et al; 2012</b> | Uganda              | Qualitative, prospective     | 82  | on ART             | Focus group discussions                      | -            | Pill burden, Food insecurity, Traveling/moving away, Disruptions in daily routine, Perceived health status, Side effects (might reveal status), Disclosure, Psychosocial support, Positive recovery effects, Memory aids, Spouse/Children, Counselling                                                                            |
| <b>Obirikorang, C; et al; 2013</b>    | Ghana               | Cross-sectional, prospective | 201 | on ART             | Self-report                                  | 62,2% [100%] | Regular follow-up, Perceived health status, Social support, Other ailments, Side effects                                                                                                                                                                                                                                          |
| <b>Okoror, T; et al; 2013</b>         | Nigeria             | Qualitative, prospective     | 35  | on ART             | Focus group discussions, Interviews in-depth | -            | Disclosure, Perceived health-status, Acceptance, Clinic buddy, Daily routines                                                                                                                                                                                                                                                     |
| <b>Oku, AO; et al; 2013</b>           | Nigeria             | Cross-sectional, prospective | 411 | on ART [3> months] | Self-report                                  | 59,50%       | Geographical area, Free ART, Perceived health status, Financial challenges                                                                                                                                                                                                                                                        |

|                                     |              |                              |     |                    |                                                                                                |                                                                                                                                                                             |                                                                                                                                                                                                                                                                 |
|-------------------------------------|--------------|------------------------------|-----|--------------------|------------------------------------------------------------------------------------------------|-----------------------------------------------------------------------------------------------------------------------------------------------------------------------------|-----------------------------------------------------------------------------------------------------------------------------------------------------------------------------------------------------------------------------------------------------------------|
| <b>Oku, AO; et al; 2014</b>         | Nigeria      | Cross-sectional, prospective | 393 | on ART [3> months] | Self-report                                                                                    | 50,40%                                                                                                                                                                      | Use of traditional/herbal medicines, Perceived health status, Food insecurity                                                                                                                                                                                   |
| <b>Olisah, VO; et al; 2010</b>      | Nigeria      | Cross-sectional, prospective | 310 | on ART             | Self-report                                                                                    | 73,00%                                                                                                                                                                      | Depression                                                                                                                                                                                                                                                      |
| <b>Olowookere, SA; et al; 2008</b>  | Nigeria      | Cross-sectional, prospective | 318 | on ART [3> months] | Self-report and Pharmacy refill                                                                | 62,90%                                                                                                                                                                      | Perceived health status, Simply forgot, Disclosure                                                                                                                                                                                                              |
| <b>Omosanya, OE; et al; 2014</b>    | Nigeria      | Cross-sectional, prospective | 100 | on ART [3> months] | Self-report                                                                                    | 88,00%                                                                                                                                                                      | Stigma, Discrimination                                                                                                                                                                                                                                          |
| <b>Orrell, C; et al; 2003</b>       | South Africa | Cohort, prospective          | 289 | on ART [1 month]   | Pill count                                                                                     | 63% [90%>]                                                                                                                                                                  | Pill burden/Doses frequency, Age, Language                                                                                                                                                                                                                      |
| <b>Oyugi, JH; et al; 2007</b>       | Uganda       | Cohort, prospective          | 97  | on ART             | Self-report, 30 day analogue scale, Unannounced pill counts and Electronic medication monitors | Self-report 93% [12 weeks] & 91% [24 weeks] VA 95% [12 weeks] & 90% [24 weeks] pill count adherence 90% [12 weeks] & 87% [24 weeks] and EMM 91% [12 weeks] & 82% [24 weeks] | No significant determinants were found                                                                                                                                                                                                                          |
| <b>Pefura-Yone, EW; et al; 2013</b> | Cameroon     | Cross-sectional, prospective | 889 | on ART             | Self-report [CPCRA & CASE]                                                                     | 58,3% [combined] 77,5% [CPCRA] & 65,1% [CASE]                                                                                                                               | CPCRA index; Employment, Use of alcohol, Change in care, Duration of ART, Pentecostal Christianity, Poor adherence to Co-trimoxazole; CASE; Employment, Use of alcohol, Tuberculosis, Change in care/regimen, Duration of ART, Poor adherence to Co-trimoxazole |

|                                                    |               |                                     |                                         |                       |                                                                       |                                       |                                                                                                                                                                                                                                                                                                                                                                               |
|----------------------------------------------------|---------------|-------------------------------------|-----------------------------------------|-----------------------|-----------------------------------------------------------------------|---------------------------------------|-------------------------------------------------------------------------------------------------------------------------------------------------------------------------------------------------------------------------------------------------------------------------------------------------------------------------------------------------------------------------------|
| <b>Peltzer, K; et al; 2010</b>                     | South Africa  | Cross-sectional, prospective        | 735 Starting ART, 519 6 month follow up | start ART + follow up | Self-report, Visual Analog Scale and Adult AIDS Clinical Trials Group | 82.9% [VAS-test] & 70.8% [AATCG]      | VAS: Education, Marital status, Geographical area. Dose schedule food; Geographical adherence                                                                                                                                                                                                                                                                                 |
| <b>Peltzer, K; Friend-du Preez, N; et al; 2011</b> | South Africa  | Cohort, prospective                 | 735 [start], 499 [20 months]            | start ART + follow up | 30-day visual analogue scale                                          | 89,6% [12 months] & 91,6% [20 months] | 12 months; Religion, Geographical area, Being a house maker, Employment, CD4 cell count, Use of traditional/alternative medicine. 20 months; Religion, Employment, Use of traditional/alternative medicine, CD4 cell count                                                                                                                                                    |
| <b>Penn, C; et al; 2011</b>                        | South Africa  | Qualitative, prospective            | 124                                     | on ART                | Interviews, semi-structured                                           | -                                     | Knowledge of HIV/ART, Trust in health care workers, Perceived health status, Disclosure, Support groups, Holistic treatment, Follow up defaulters, Stigma, Support government/NGO, Language, Side effects, Counselling, Dissatisfaction of care, Religion, Use of alcohol, Substance abuse, Forgetting, Financial challenges, Change in regimen/care, Food insecurity, Stress |
| <b>Ramadhani, HO; et al; 2007</b>                  | Tanzania      | Cross-sectional cohort, prospective | 150                                     | on ART [6 months>]    | Self-report, CD4 count and Viral load                                 | 84,00%                                | Disclosure, Free ART, Distance to clinic, Sacrifice of health care for other necessities                                                                                                                                                                                                                                                                                      |
| <b>Rasmussen, D; et al; 2013</b>                   | Guinea-Bissau | Qualitative, prospective            | 20                                      | on ART                | Interviews, semi-structured                                           | -                                     | HIV related knowledge, Food insecurity, Financial challenges, Dissatisfaction with care, Disclosure, Traditional conviction, Perceived health-status, Trust in health care worker, Social support                                                                                                                                                                             |

|                                  |              |                                         |     |                    |                                                         |                                                                                                  |                                                                                                                                                                                                                                                                                              |
|----------------------------------|--------------|-----------------------------------------|-----|--------------------|---------------------------------------------------------|--------------------------------------------------------------------------------------------------|----------------------------------------------------------------------------------------------------------------------------------------------------------------------------------------------------------------------------------------------------------------------------------------------|
| <b>Ross, A; et al; 2011</b>      | South Africa | Qualitative, prospective                | 21  | on ART             | Focus group discussions and Interviews free attitude    | -                                                                                                | Disclosure, Financial challenges, Acceptance of HIV status, Previous experiences with losing people, Belief in ART, Personal and family responsibility, Perceived health status, Social support, Adherence counselling                                                                       |
| <b>Rougemont, M; et al; 2009</b> | Cameroon     | Cohort, prospective                     | 312 | starting ART       | CD4 count, self-report and Pharmacy refill              | 83% [self-report, first month, 100%] to 57% [self-report, 6 months, 100%], 77% [pharmacy refill] | Age, Perceived health status, Employment, Female gender                                                                                                                                                                                                                                      |
| <b>Roux, P; et al; 2011</b>      | Cameroon     | Cohort, prospective                     | 401 | starting ART       | Self-report and Visual analogue scale                   | 73% [first month, 100%] to 61% [month 24, 100%]                                                  | Duration of ART, WHO stage, Use of alcohol, Necessity/Utility ART                                                                                                                                                                                                                            |
| <b>Sanjobo, N; et al; 2008</b>   | Zambia       | Qualitative, prospective                | 72  | on ART             | Focus group discussions and Interviews, semi-structured | -                                                                                                | Free treatment, Trust in health care workers, Perceived health status, Religion, Disclosure, Support group, Support by NGO, Dissatisfaction with care, Forgetfulness, Distance to clinic, Use of alcohol, Side effects, Stigma/discrimination, Use of alternative treatment, Food insecurity |
| <b>Sasaki, Y; et al; 2012</b>    | Zambia       | observational longitudinal, prospective | 157 | start ART          | Self-report                                             | 59.9% [100%]                                                                                     | Female gender, Disclosure, Food insecurity, Being farmer, Spouse receiving ART                                                                                                                                                                                                               |
| <b>Senkomago, V; et al; 2011</b> | Uganda       | Cross-sectional, prospective            | 143 | on ART [6> months] | Self-report and Pill count                              | 88.6% [agreement between methods one month], 94.2% [3 months] and 86.4% [6 months]               | Geographical area                                                                                                                                                                                                                                                                            |

|                                                        |            |                              |     |                    |                                                   |                                                                                             |                                                                                                                                                                                                                                                                                                                                                                                                              |
|--------------------------------------------------------|------------|------------------------------|-----|--------------------|---------------------------------------------------|---------------------------------------------------------------------------------------------|--------------------------------------------------------------------------------------------------------------------------------------------------------------------------------------------------------------------------------------------------------------------------------------------------------------------------------------------------------------------------------------------------------------|
| <b>Shaahu, V; et al; 2008</b>                          | Nigeria    | Cross-sectional, prospective | 428 | on ART             | Self-report                                       | 62,10%                                                                                      | Availability ART, Age, Failed to keep clinic appointments                                                                                                                                                                                                                                                                                                                                                    |
| <b>Shumba, C; et al; 2013</b>                          | Uganda     | Cross-sectional, prospective | 763 | on ART             | Self-report                                       | 97% [not missed doses in last week], 93% [not missed appointments in the past three months] | Use of alcohol                                                                                                                                                                                                                                                                                                                                                                                               |
| <b>Skovdal, M; Campbell, C; et al; 2011</b>            | Zimbabwe   | Qualitative, prospective     | 78  | on ART             | Focus group discussions and Interviews individual | -                                                                                           | Masculinity                                                                                                                                                                                                                                                                                                                                                                                                  |
| <b>Skovdal, M; Campbell, C; Nhongo, K; et al; 2011</b> | Zimbabwe   | Qualitative, prospective     | 78  | on ART             | Focus group discussions and interviews in-depth   | -                                                                                           | Distance to clinic, Financial challenges, Knowledge about HIV/ART, Necessity/Utility ART, Social support, Clinic buddy, Support by NGO/Government, Counselling, Perceived health-status, Daily routine, Disclosure, Employment, Adherence self-efficacy, Food insecurity, Stigma, Masculinity, Trust in health care workers, Religion, Side effects, Use of alcohol, Use of traditional/alternative medicine |
| <b>Sow, PG; et al; 2012</b>                            | Senegal    | Cross-sectional, prospective | 60  | on ART [6> months] | Self-report                                       | 79,00%                                                                                      | Pill burden, Perceived health status, Stigma                                                                                                                                                                                                                                                                                                                                                                 |
| <b>Stubbs, BA; et al; 2009</b>                         | Mozambique | Case control, retrospective  | 375 | on ART [6 months]  | Pharmacy records                                  | 87,50%                                                                                      | Clinic buddy                                                                                                                                                                                                                                                                                                                                                                                                 |
| <b>Tadesse, WT; et al; 2014</b>                        | Ethiopia   | Cross-sectional, prospective | 384 | on ART             | Self-report                                       | 96,35%                                                                                      | No significant determinants were found                                                                                                                                                                                                                                                                                                                                                                       |
| <b>Talam, NC; et al; 2008</b>                          | Kenya      | Cross-sectional, prospective | 384 | on ART             | Self-report                                       | 43,2% [100%]                                                                                | Stigma, Employment, Regimen type                                                                                                                                                                                                                                                                                                                                                                             |



|                                    |          |                              |     |                        |                                            |                                                                                     |                                                                                                                |
|------------------------------------|----------|------------------------------|-----|------------------------|--------------------------------------------|-------------------------------------------------------------------------------------|----------------------------------------------------------------------------------------------------------------|
| <b>Tessema, B; et al; 2010</b>     | Ethiopia | Cross-sectional, prospective | 504 | on ART [3> months]     | Self-report                                | 82,70%                                                                              | Side effects, Psychiatric care, Hopeless, Necessity/Utility of ART                                             |
| <b>Thielman, NM; et al; 2014</b>   | Tanzania | Cohort, prospective          | 442 | on ART                 | Self-report, Viral load and CD4 cell count | 96% [self-report, non-religious attendees] & 80% [self-report, religious attendees] | Religion                                                                                                       |
| <b>Tiyou, A; et al; 2010</b>       | Ethiopia | Cross-sectional, prospective | 319 | on ART [3> months]     | Self-report (dose, time and food)          | 72,40%                                                                              | Social support                                                                                                 |
| <b>Tuller D; et al; 2010</b>       | Uganda   | Qualitative, prospective     | 41  | on ART                 | Interviews, semi-structured                | 68,3% [100%]                                                                        | Coping strategies, Financial challenges                                                                        |
| <b>Tumwine, G; et al; 2012</b>     | Uganda   | Qualitative, prospective     | 39  | ever started ART       | Interviews, semi-structured                | -                                                                                   | Religion, Counselling, Perceived health status                                                                 |
| <b>Ukwe, CC; et al; 2010</b>       | Nigeria  | Observational, prospective   | 299 | on ART                 | Self-report                                | 86,10%                                                                              | Memory aids                                                                                                    |
| <b>Unge, C; et al; 2009</b>        | Kenya    | Cohort, retrospective        | 830 | on ART                 | Pharmacy refill                            | 73,00%                                                                              | No significant determinants were found                                                                         |
| <b>Unge, C; et al; 2010</b>        | Kenya    | Cohort, prospective          | 352 | Starting ART or on ART | Self-report dose and index                 | 89% [dose adherence] & 62% [adherence index]                                        | Female gender, Disclosure, Dissatisfaction in care, Education, Employment, Distance to clinic, Duration of ART |
| <b>Uzochukwu, BSC; et al; 2009</b> | Nigeria  | Cross-sectional, prospective | 174 | on ART [12> months]    | Self-report                                | 25% [100%]                                                                          | Age, Marital status, Education, Male gender, Distance to clinic                                                |

|                                        |          |                              |     |                                   |                                                                        |                                         |                                                                                                                                                                                  |
|----------------------------------------|----------|------------------------------|-----|-----------------------------------|------------------------------------------------------------------------|-----------------------------------------|----------------------------------------------------------------------------------------------------------------------------------------------------------------------------------|
| <b>van Griensven, J; et al; 2010</b>   | Rwanda   | Cohort, retrospective        | 609 | on ART [1 year]                   | Pharmacy refill                                                        | 44,80%                                  | No significant determinants were found                                                                                                                                           |
| <b>van Oosterhout, JJ; et al; 2005</b> | Malawi   | Cross-sectional, prospective | 176 | on ART [6 months]                 | Self-report                                                            | 52% [100%]                              | Regimen type                                                                                                                                                                     |
| <b>Vyankandona, J; et al; 2013</b>     | Rwanda   | Cohort, prospective          | 213 | starting ART                      | Mixed methods                                                          | 96% [self-report] & 74-78% [pill count] | Quantitative: Disclosure, Knowledge about ART<br>Qualitative: Perceived health-status, Disclosure, Stigma, Acceptance HIV, Financial challenges, Daily routine                   |
| <b>Wakibi, SN; et al; 2011</b>         | Kenya    | Cross-sectional, prospective | 416 | on ART [3> months]                | CASE adherence index                                                   | 82,00%                                  | Age, Daily routine, Social support, Duration of ART, Dissatisfaction with care, Distance to clinic                                                                               |
| <b>Watt, M; et al; 2009</b>            | Tanzania | Qualitative, prospective     | 42  | on ART                            | Interviews, semi-structured                                            | -                                       | Perceived health status, Obligation to family, Daily routine, Social support, Trust in health care workers, Being busy, Other ailments, Financial challenges, Depression, Stigma |
| <b>Watt, M; John, M; et al; 2009</b>   | Tanzania | Qualitative, prospective     | 36  | on ART [1> month]                 | Interviews, semi-structured                                            | -                                       | Religion, Necessity/Utility ART, Daily routine, Stigma                                                                                                                           |
| <b>Watt, MH; et al; 2010</b>           | Tanzania | Cross-sectional, prospective | 340 | on ART [1> month]                 | Self-report                                                            | 94,10%                                  | Age, Trust in health care worker, Missed clinic appointments                                                                                                                     |
| <b>Weiser, SD; et al; 2003</b>         | Botswana | Cross-sectional, prospective | 109 | on ART [3 months]                 | Questionnaire and Adult aids clinical trial group adherence instrument | 54,00%                                  | Financial challenges, Education, Side effects, Disclosure                                                                                                                        |
| <b>Weiser, SD; et al; 2010</b>         | Uganda   | Qualitative, prospective     | 47  | Starting ART (11) and on ART (36) | Interviews, semi-structured                                            | -                                       | Knowledge of ART, Food insecurity, Side effects, Financial challenges, Employment                                                                                                |
| <b>Weiser, SD; et al; 2014</b>         | Uganda   | Cohort, prospective          | 438 | on ART                            | Visual analogue scale [VAS], Viral load and CD4 count                  | 71,4% [>90%]                            | Food insecurity, Age, Male gender, Employment, Use of alcohol                                                                                                                    |

|                                |          |                              |     |        |                                                     |                                |                                                    |
|--------------------------------|----------|------------------------------|-----|--------|-----------------------------------------------------|--------------------------------|----------------------------------------------------|
| <b>Whetten, K; et al; 2013</b> | Tanzania | Cohort, prospective          | 468 | on ART | Aids clinical trial group and Visual analogue scale | 82,70%                         | Childhood trauma, Depression, Social support, PTSD |
| <b>Wroe, EB; et al; 2014</b>   | Rwanda   | Cross-sectional, prospective | 292 | on ART | Self-report and CASE adherence index                | 84% [self-report] & 87% [CASE] | Depression                                         |
