# Supplementary material for: Determinants of adherence to antiretroviral therapy among HIV-positive adults in sub-Saharan Africa: a systematic review
Source: PubMed Central journal article supplement — BMJ Glob Health. 2016 Dec 30;1(4):e000125. doi: 10.1136/bmjgh-2016-000125 (PMC5321378; doi:10.1136/bmjgh-2016-000125), 2016-12-30
Supplement: bmjgh-2016-000125supp5.pdf [file bmjgh-2016-000125supp5.pdf]

Sample sizes and number of studies included per determinant

| <b>Theme</b>                                    | <b>Determinant</b>                               | <b>Number of studies</b> | <b>Sample size</b> |
|-------------------------------------------------|--------------------------------------------------|--------------------------|--------------------|
| <i>Sociodemographic</i>                         | Urban treatment site                             | 3                        | 1423               |
|                                                 | Cost barrier to treatment                        | 5                        | 1218               |
|                                                 | Use of herbal/traditional medicine/treatment     | 5                        | 1903               |
|                                                 | Non-use of herbal/traditional medicine/treatment | 1                        | 393                |
|                                                 | Food insecurity                                  | 6                        | 4550               |
|                                                 | Low income/poverty                               | 6                        | 3029               |
|                                                 | Formal education                                 | 5                        | 1484               |
|                                                 | Low or no education                              | 7                        | 2454               |
|                                                 | Age group 35-50+                                 | 6                        | 24974              |
|                                                 | Age group 15-35                                  | 8                        | 42412              |
|                                                 | Male                                             | 7                        | 6237               |
|                                                 | Female                                           | 7                        | 2690               |
|                                                 | Does not drink                                   | 2                        | 2183               |
|                                                 | Binge drinking                                   | 9                        | 13822              |
|                                                 | Use of alcohol                                   | 10                       | 9018               |
| <i>Psychosocial</i>                             | Discrimination                                   | 4                        | 3220               |
|                                                 | Poor support                                     | 4                        | 1220               |
|                                                 | Good support                                     | 3                        | 920                |
|                                                 | Depression                                       | 8                        | 4923               |
|                                                 | Non-disclosure                                   | 7                        | 2236               |
|                                                 | Disclosure                                       | 3                        | 6019               |
| <i>Treatment</i>                                | Stock-out                                        | 2                        | 615                |
|                                                 | ART always available                             | 1                        | 428                |
|                                                 | Missing scheduled clinic visits                  | 4                        | 1259               |
|                                                 | Side effects                                     | 10                       | 4209               |
| <i>Health status</i>                            | More than 50 cells/mm <sup>3</sup>               | 1                        | 897                |
|                                                 | More than 200 cells/mm <sup>3</sup>              | 4                        | 35954              |
|                                                 | Lower than 200 cells/m <sup>3</sup>              | 2                        | 1592               |
| <i>Counseling, educations and interventions</i> | Poor knowledge                                   | 2                        | 2660               |
|                                                 | No treatment partner                             | 1                        | 375                |
|                                                 | Having a treatment partner                       | 2                        | 27611              |

## Funnel plots used to assess publication bias

### *Socio-demographic, socio-economic and lifestyle factors*

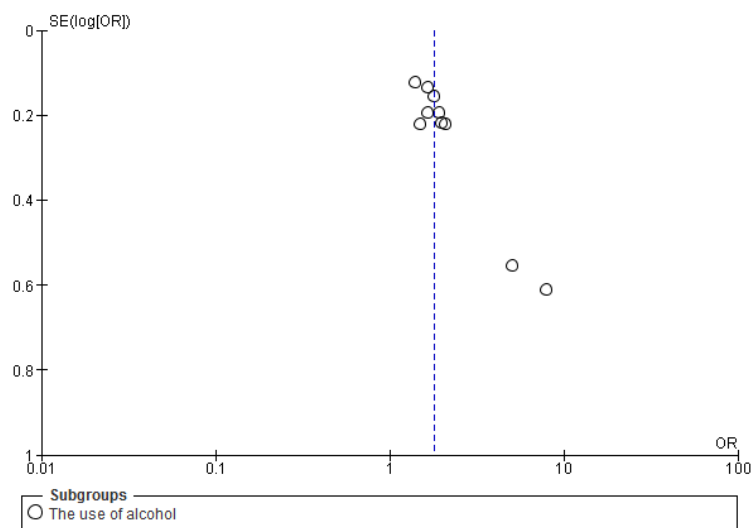

*Funnel plot 1 The use of alcohol*

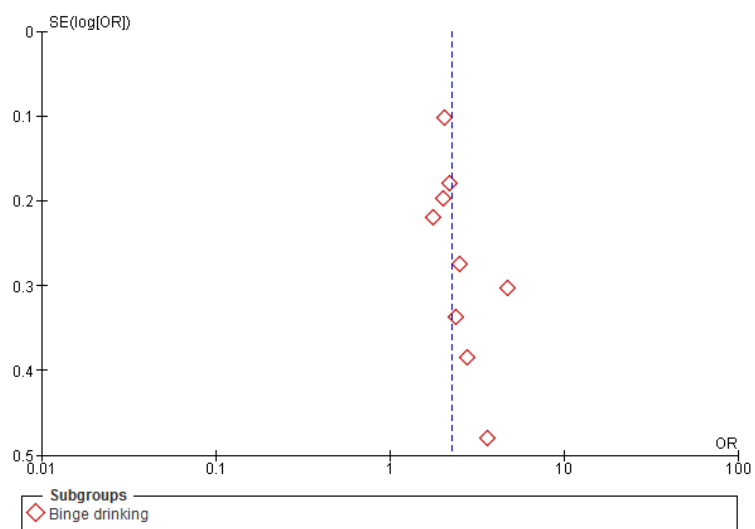

*Funnel plot 2 Binge drinking*

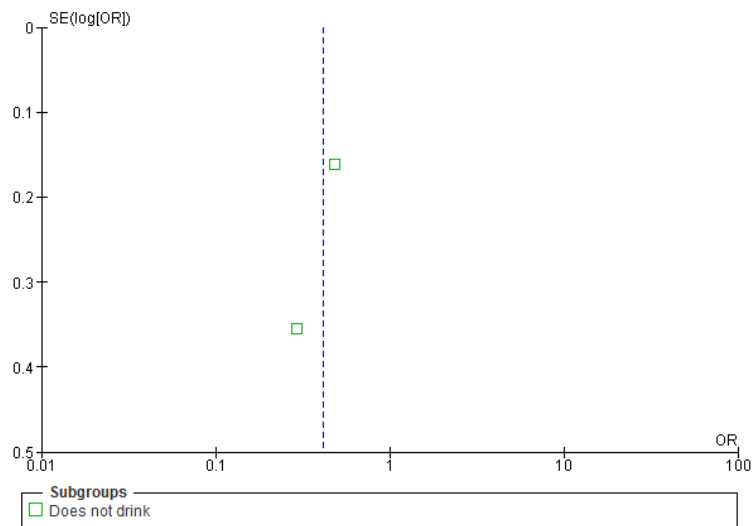

Funnel plot 3 Does not drink

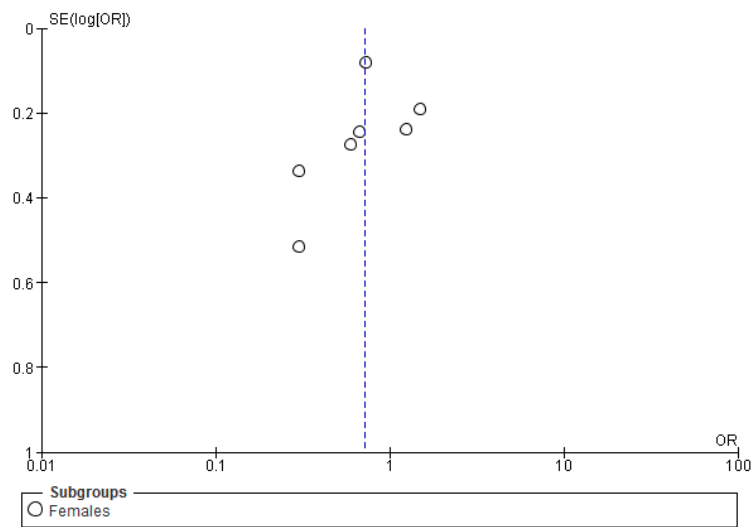

Funnel plot 4 Female gender

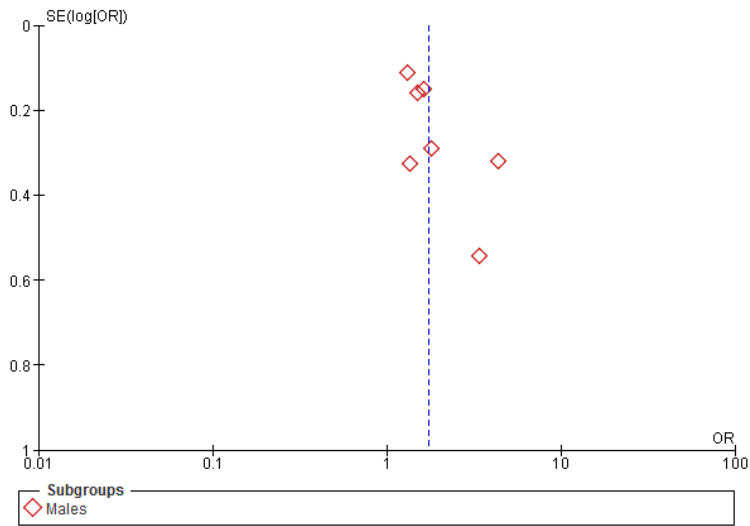

Funnel plot 5 Male gender

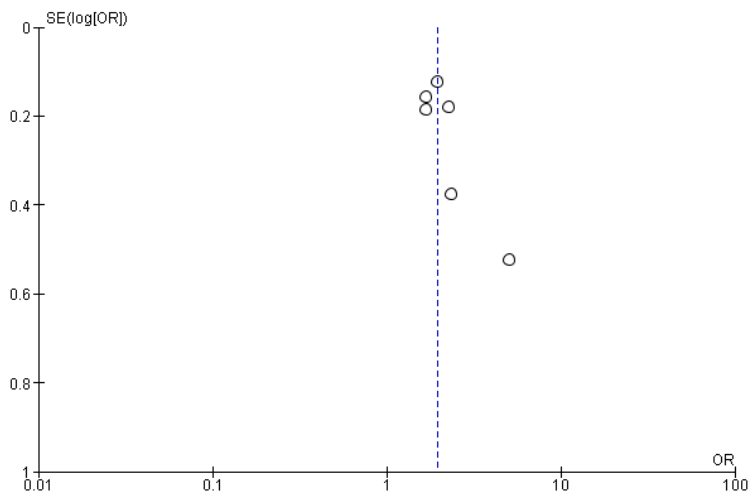

Funnel plot 6 Food insecurity

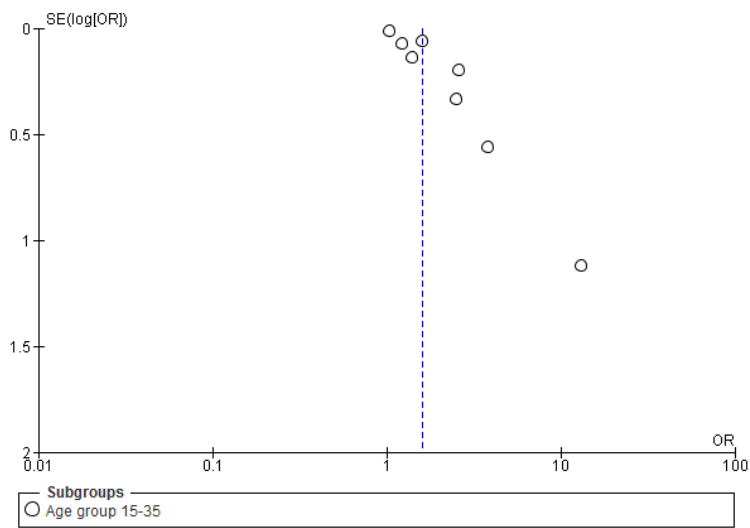

Funnel plot 7 Age group 15-35

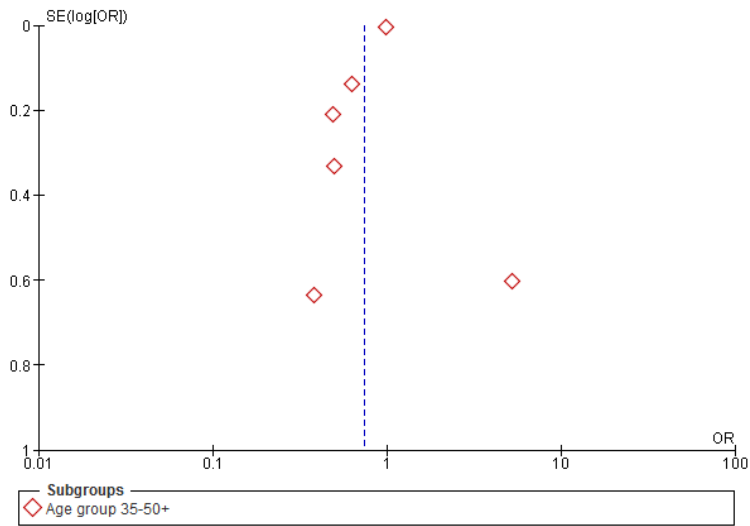

Funnel plot 8 Age group 35-50+

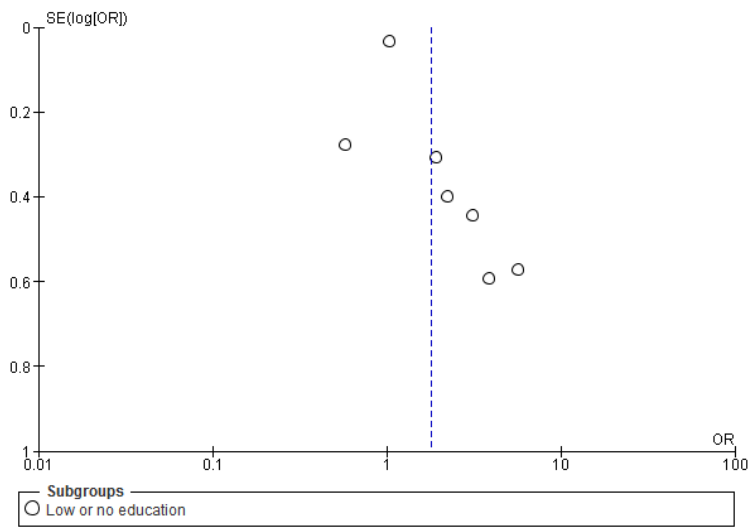

Funnel plot 9 Low or no education

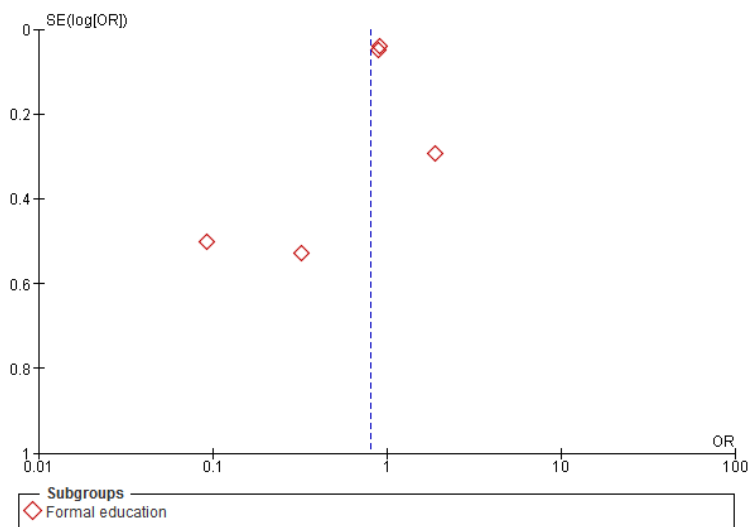

Funnel plot 10 Formal education

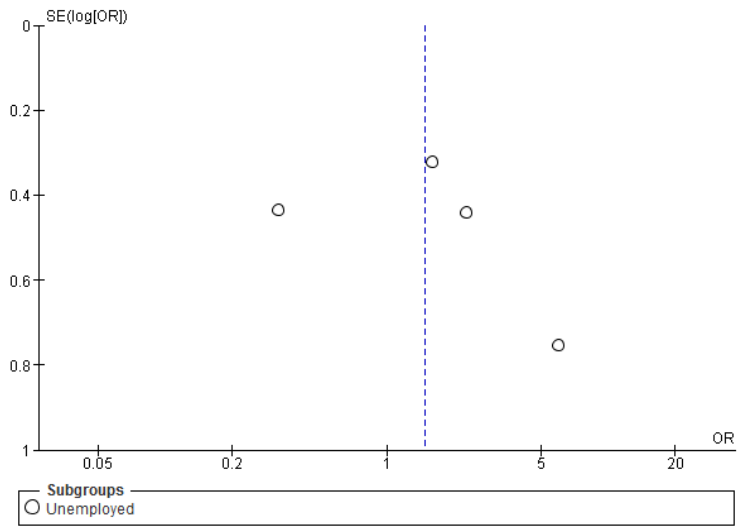

Funnel plot 11 Unemployed

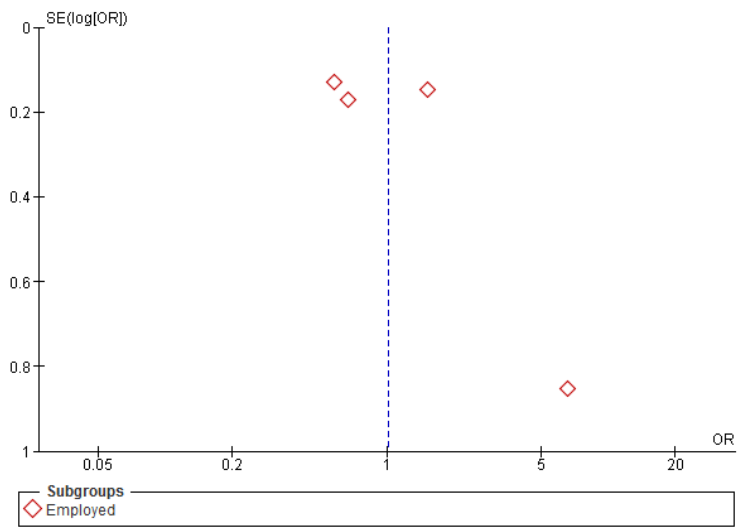

Funnel plot 12 Employed

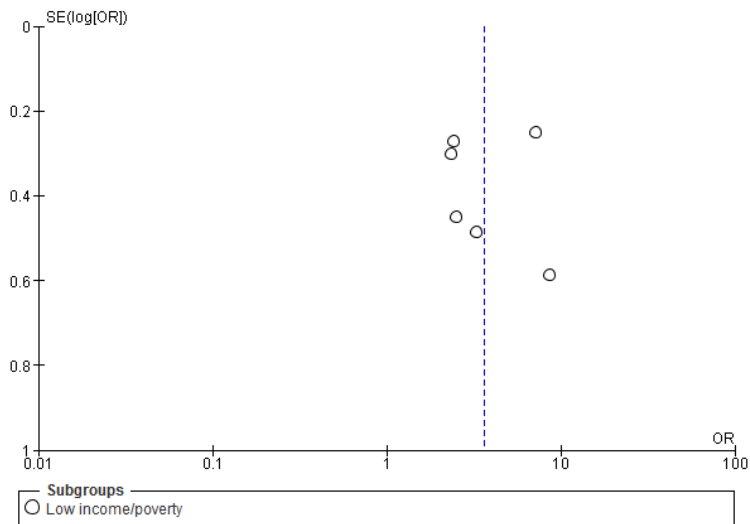

Funnel plot 13 Low income and/or living in poverty

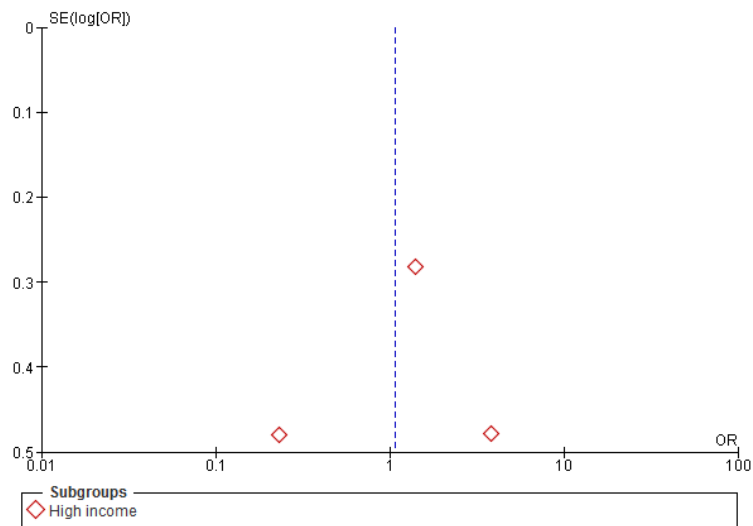

Funnel plot 14 High income

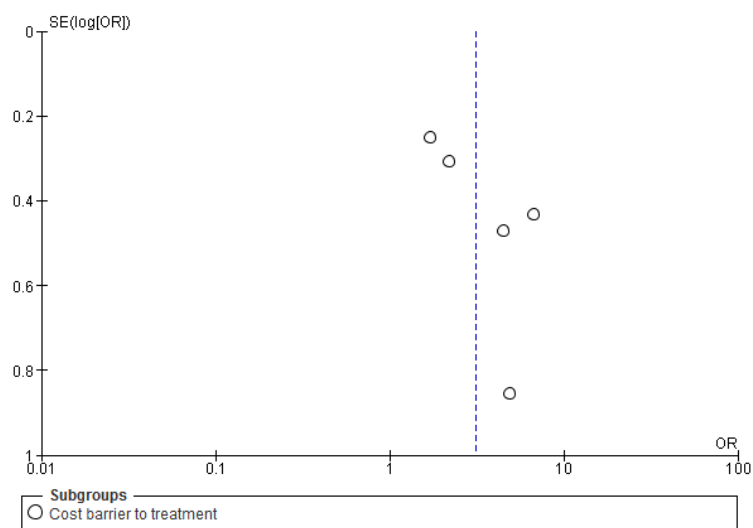

Funnel plot 15 Cost a barrier to treatment

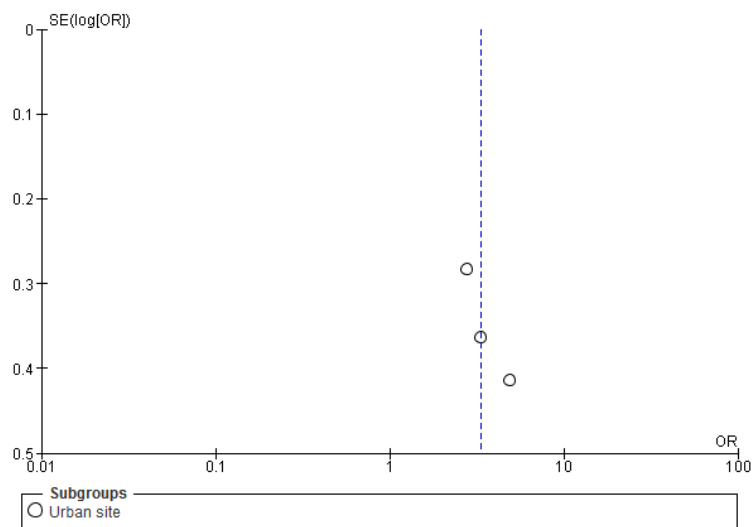

Funnel plot 16 Urban residence/treatment site

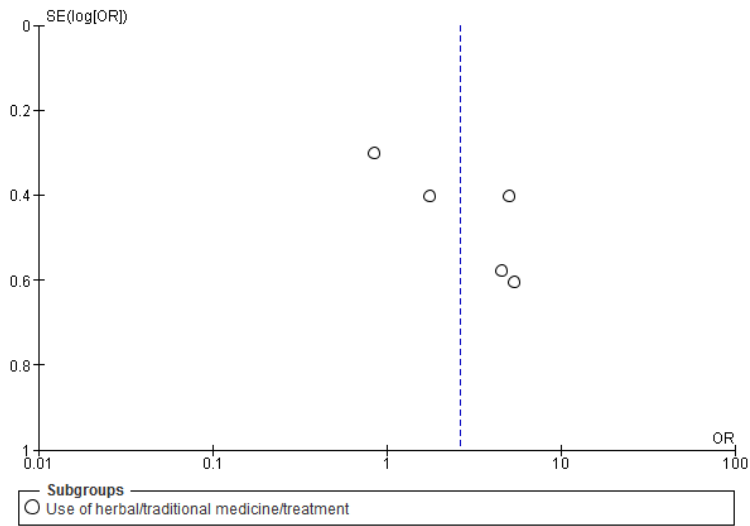

Funnel plot 17 Use of herbal/traditional medicine/treatment

**Psychosocial**

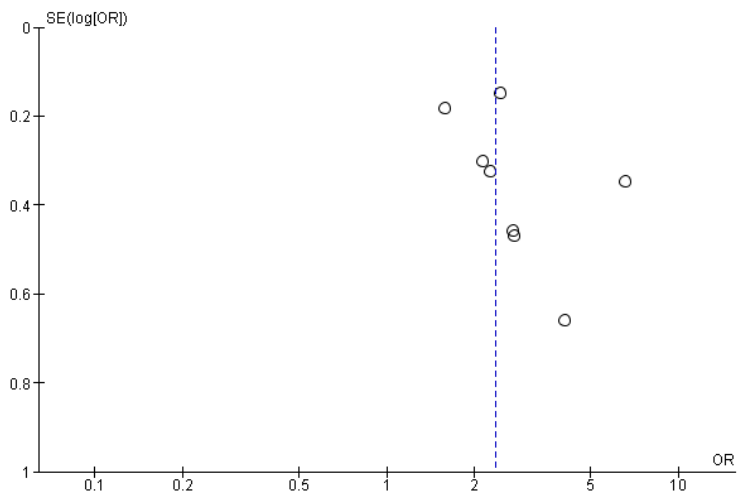

Funnel plot 18 Depression



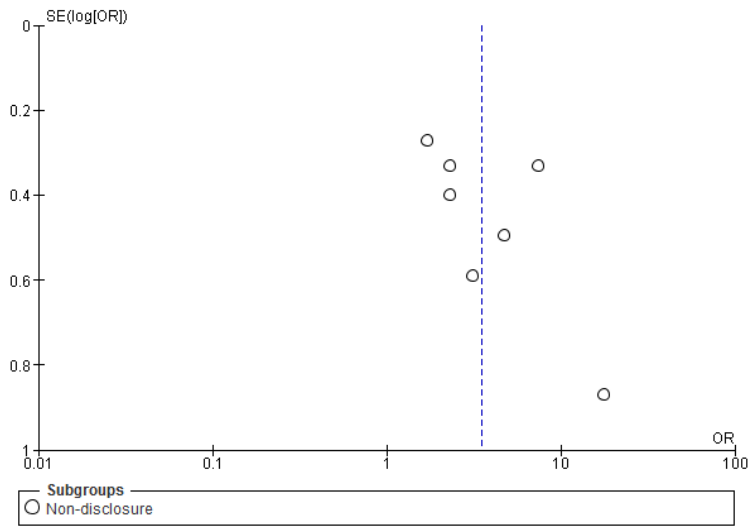

Funnel plot 19 Non-disclosure of status

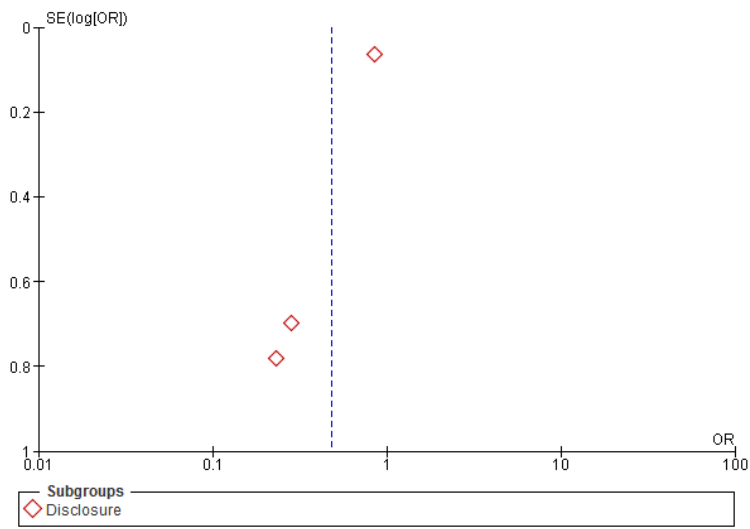

Funnel plot 20 Disclosure of status

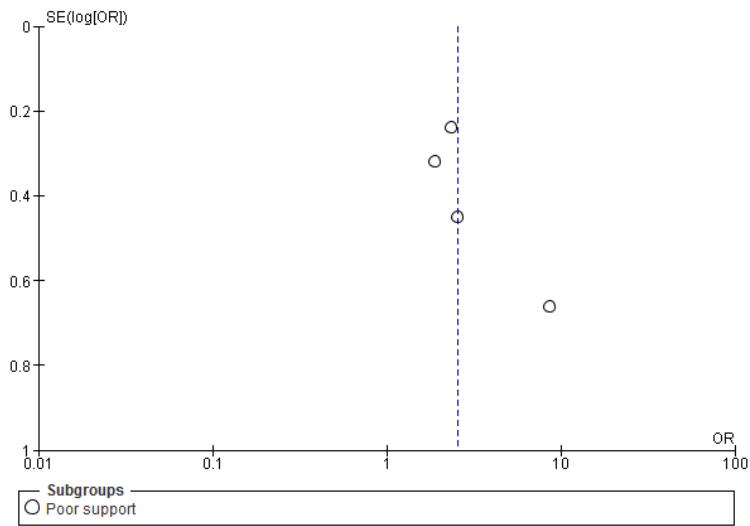

Funnel plot 21 Poor social support

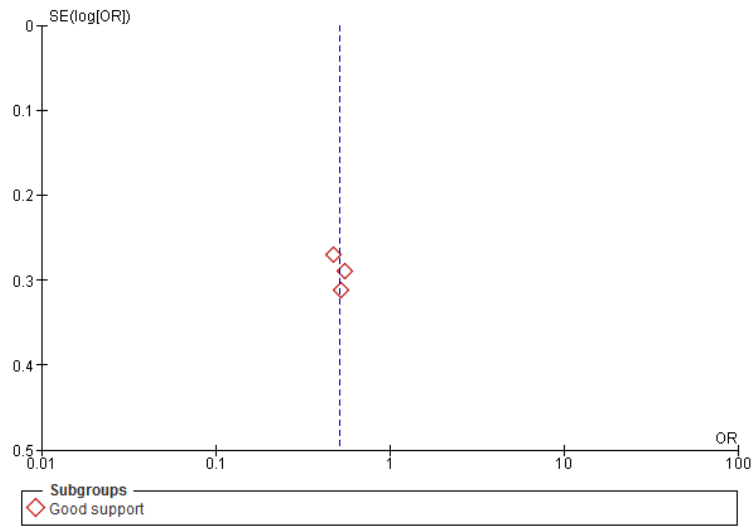

Funnel plot 22 Good social support

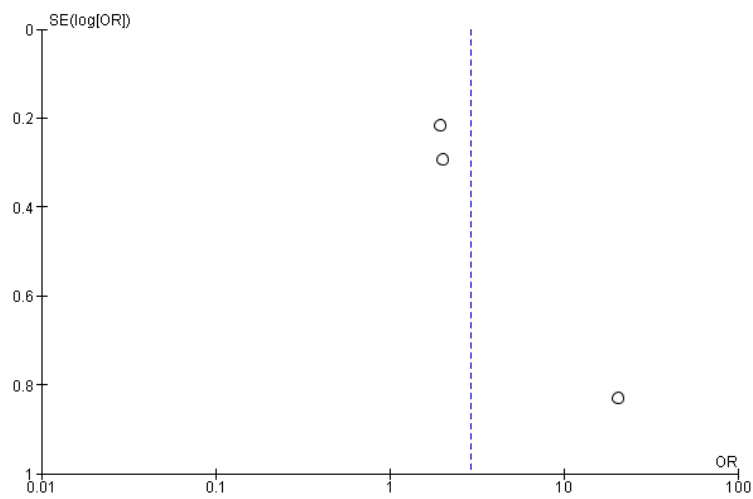

Funnel plot 23 Discrimination

Health status

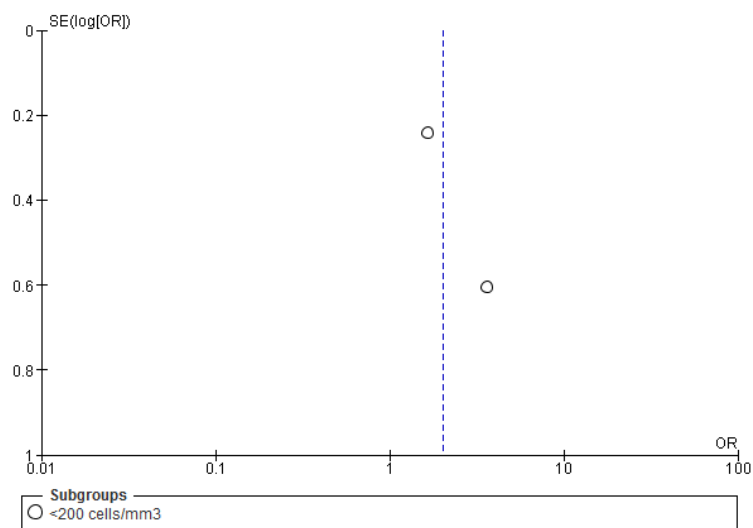

Funnel plot 24 CD4 cell count <200 cells/mm3

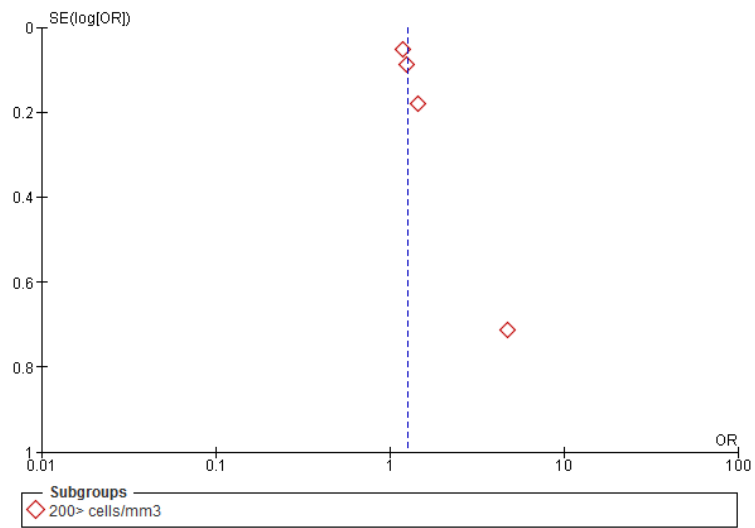

Funnel plot 25 CD4 cell count >200 cells/mm3

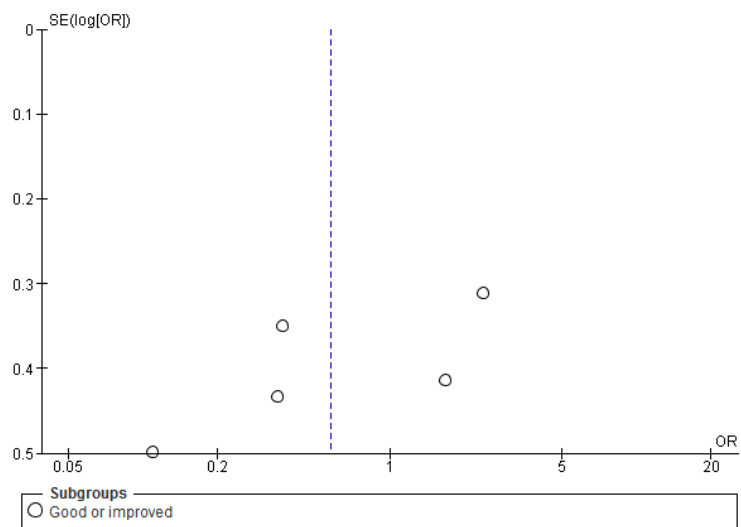

Funnel plot 26 Perceived health status good or improved

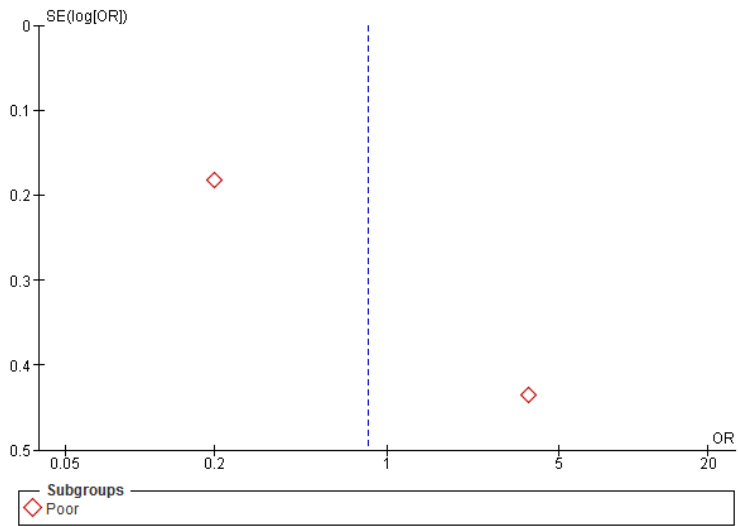

Funnel plot 27 Perceived health status as poor

Treatment and health facilities

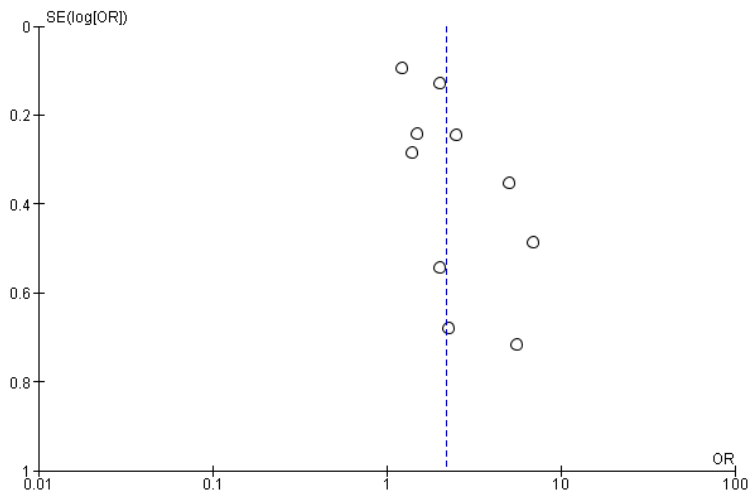

Funnel plot 28 Side effects

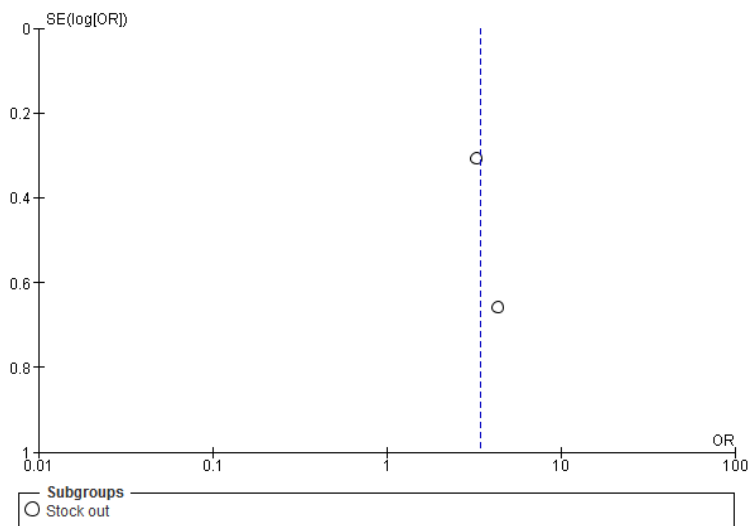

Funnel plot 29 ART stock-out

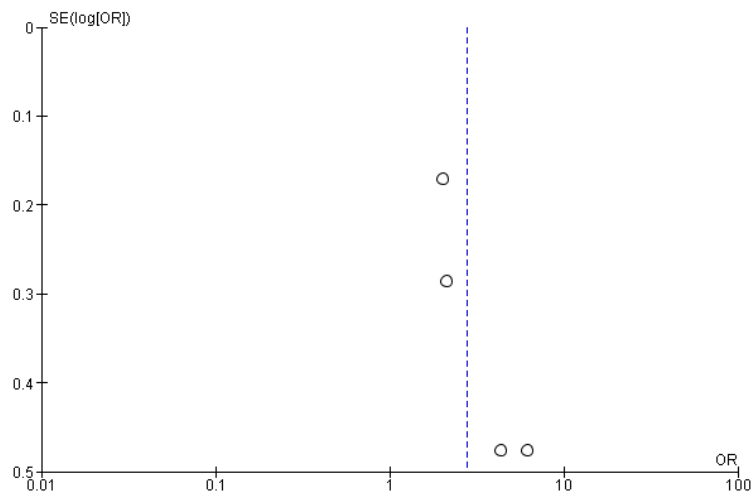

Funnel plot 30 Missing scheduled clinic visits

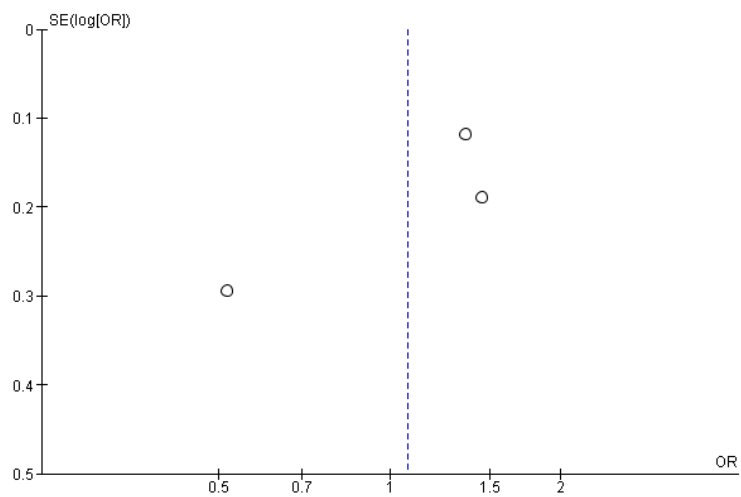

Funnel plot 31 Change in medication or regimen

**Counseling and education interventions**

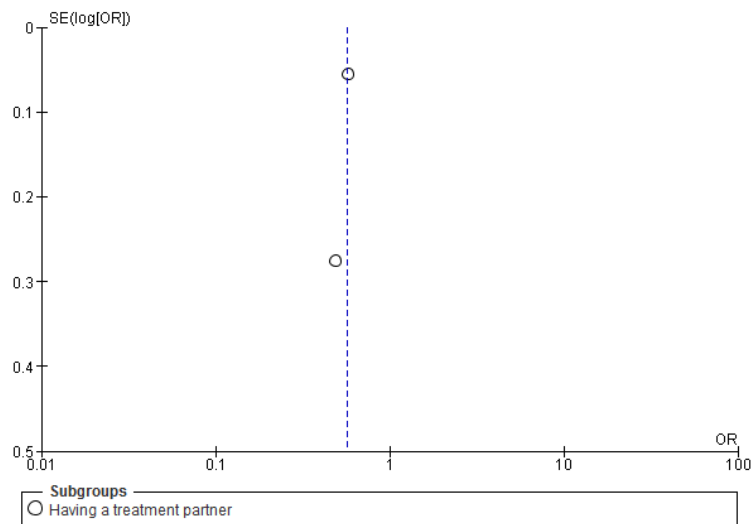

Funnel plot 32 Having a treatment partner

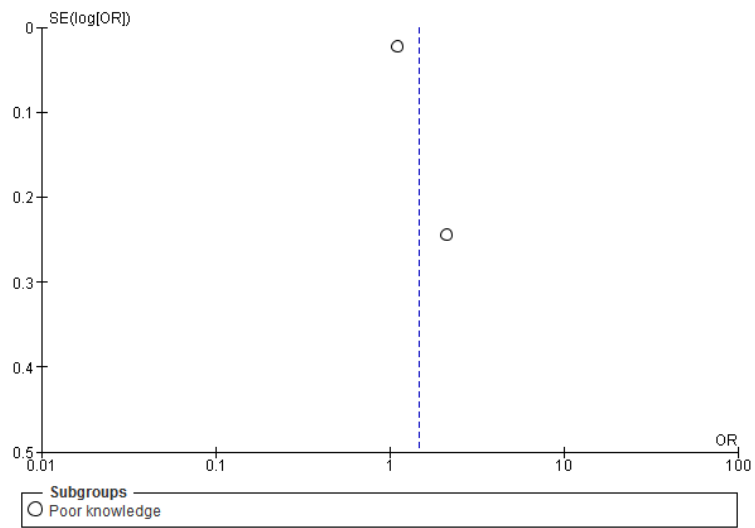

Funnel plot 33 Knowledge about ART
